# Supplementary material
Source: PubMed Central journal article supplement (PMC5495932)
Supplement: Supplemental_Material.pdf [file Supplemental_Material.pdf]

Supporting information accompanying

**A Comprehensive Analysis of Myocardial Substrate Preference Emphasizes the Need For a Synchronized Fluxomic/Metabolomic Research Design**

**Mukundan Ragavan<sup>1</sup>, Alexander Kirpich<sup>2,5</sup>, Xiaorong Fu<sup>3</sup>, Shawn C. Burgess<sup>3,4</sup>, Lauren M. McIntyre<sup>2,5,6</sup>, Matthew E. Merritt<sup>1,\*</sup>**

<sup>1</sup> Department of Biochemistry & Molecular Biology, <sup>2</sup> Department of Molecular Genetics & Microbiology, University of Florida College of Medicine, Gainesville, FL 32611, USA

<sup>3</sup> AIRC Division of Metabolic Mechanisms of Diseases, <sup>4</sup> Department of Pharmacology, The University of Texas Southwestern Medical Center, Dallas, TX 75390, USA,

<sup>5</sup> University of Florida Informatics Institute, Gainesville, FL 32611, USA

<sup>6</sup> University of Florida Genetics Institute, Gainesville, FL 32611, USA

\*corresponding author

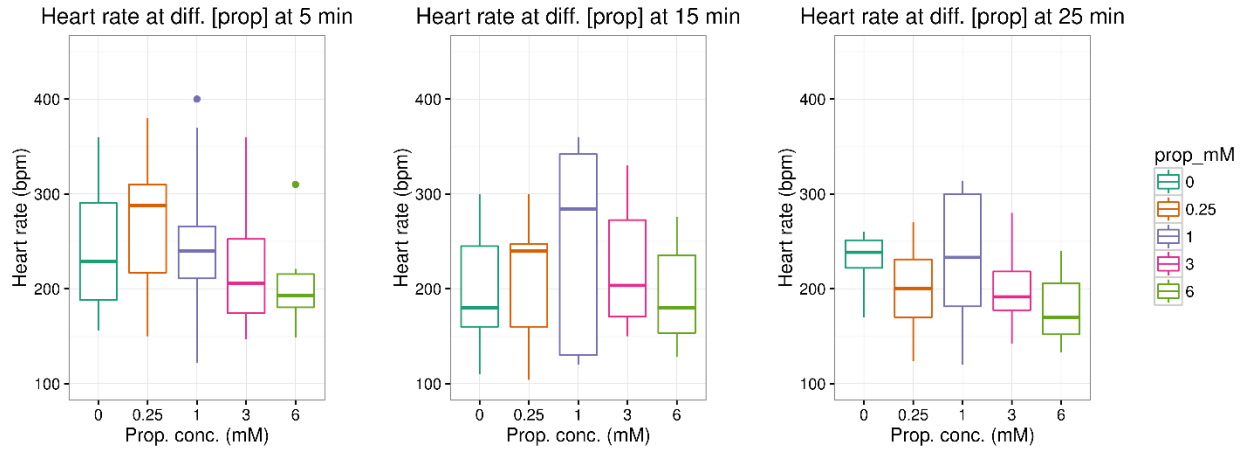

**Figure S1:** Variation of heart rate at different concentrations of propionate measured at 5, 10 and 15 minutes after the start of perfusion.

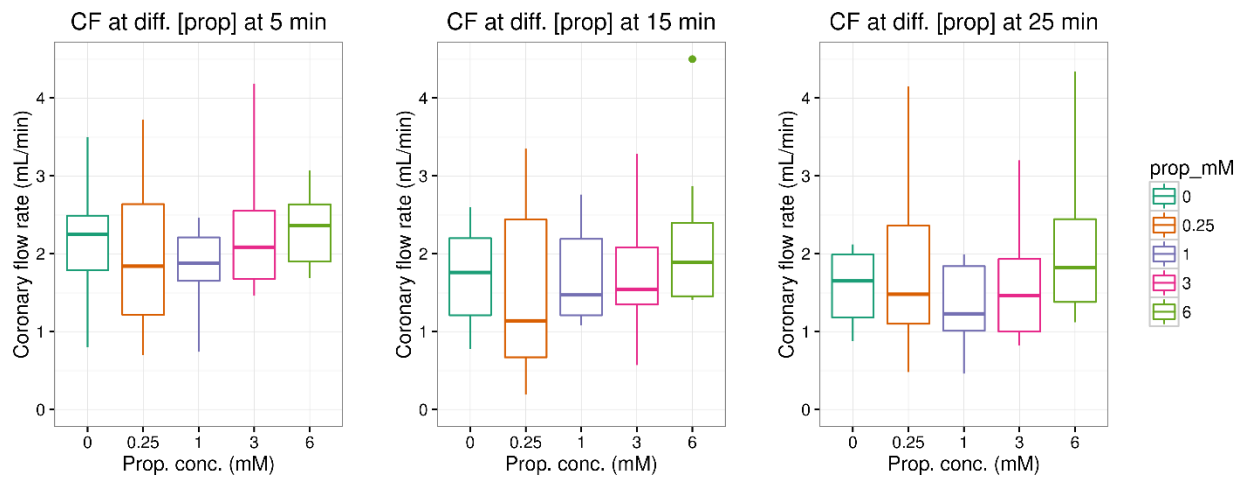

**Figure S2:** Variation of coronary flow rate at different concentrations of propionate measured at 5, 10 and 15 minutes after the start of perfusion.

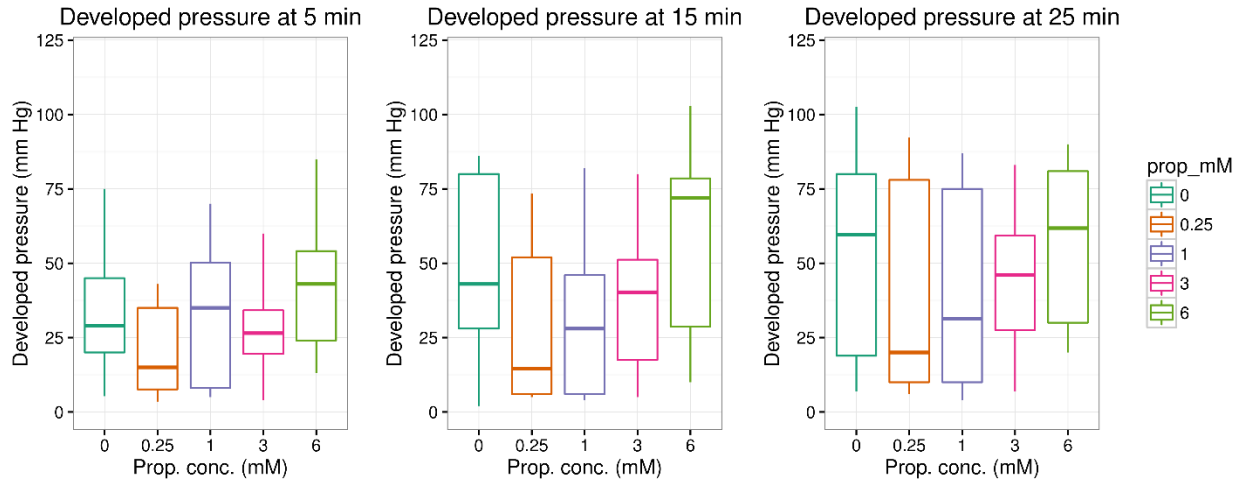

**Figure S3:** Variation of coronary at different concentrations of propionate measured at 5, 10 and 15 minutes after the start of perfusion.

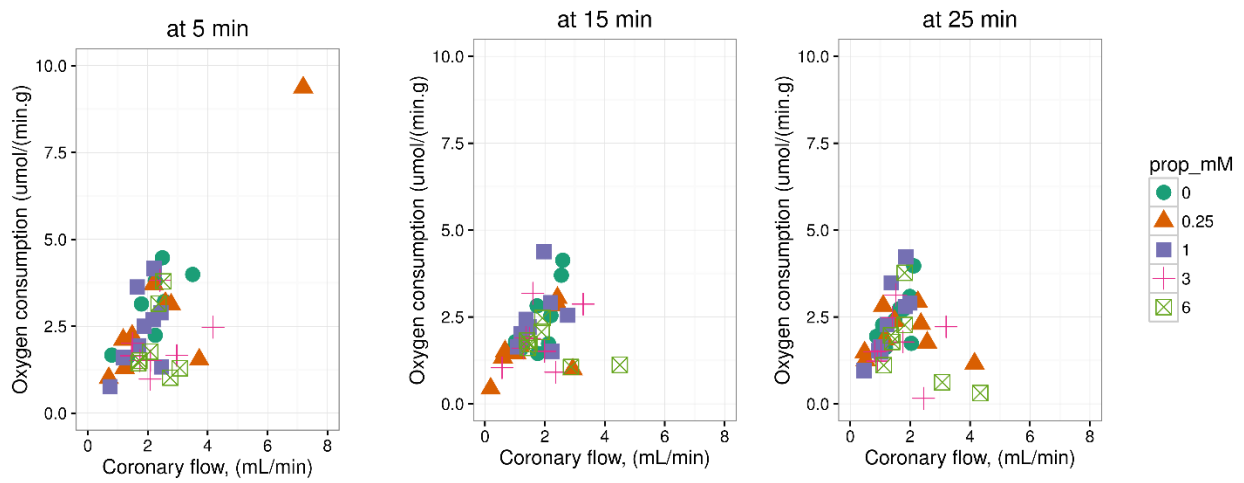

**Figure S4:** Scatter plot of coronary flow rate against oxygen consumption.

**Table S1: Average of weights of hearts used in the perfusions.**

| <b>Perfusion condition</b> | <b>Number of hearts</b> | <b>Average weight (g)</b> |
|----------------------------|-------------------------|---------------------------|
| Control (No propionate)    | 9                       | 0.179                     |
| 0.25 mM propionate         | 9                       | 0.164                     |
| 1 mM propionate            | 9                       | 0.164                     |
| 3 mM propionate            | 8                       | 0.179                     |
| 6 mM propionate            | 6                       | 0.174                     |
| <b>Total</b>               | <b>41</b>               | <b>0.172</b>              |
